# Supplementary figures and images for: Incidence Rates of Infections in Rheumatoid Arthritis Patients Treated with Janus Kinase or Interleukin-6 Inhibitors: Results of a Retrospective, Multicenter Cohort Study
Source: MDPI journal article supplement (doi:10.3390/jcm13103000), 2024-05-20

Supplementary Fig. 2

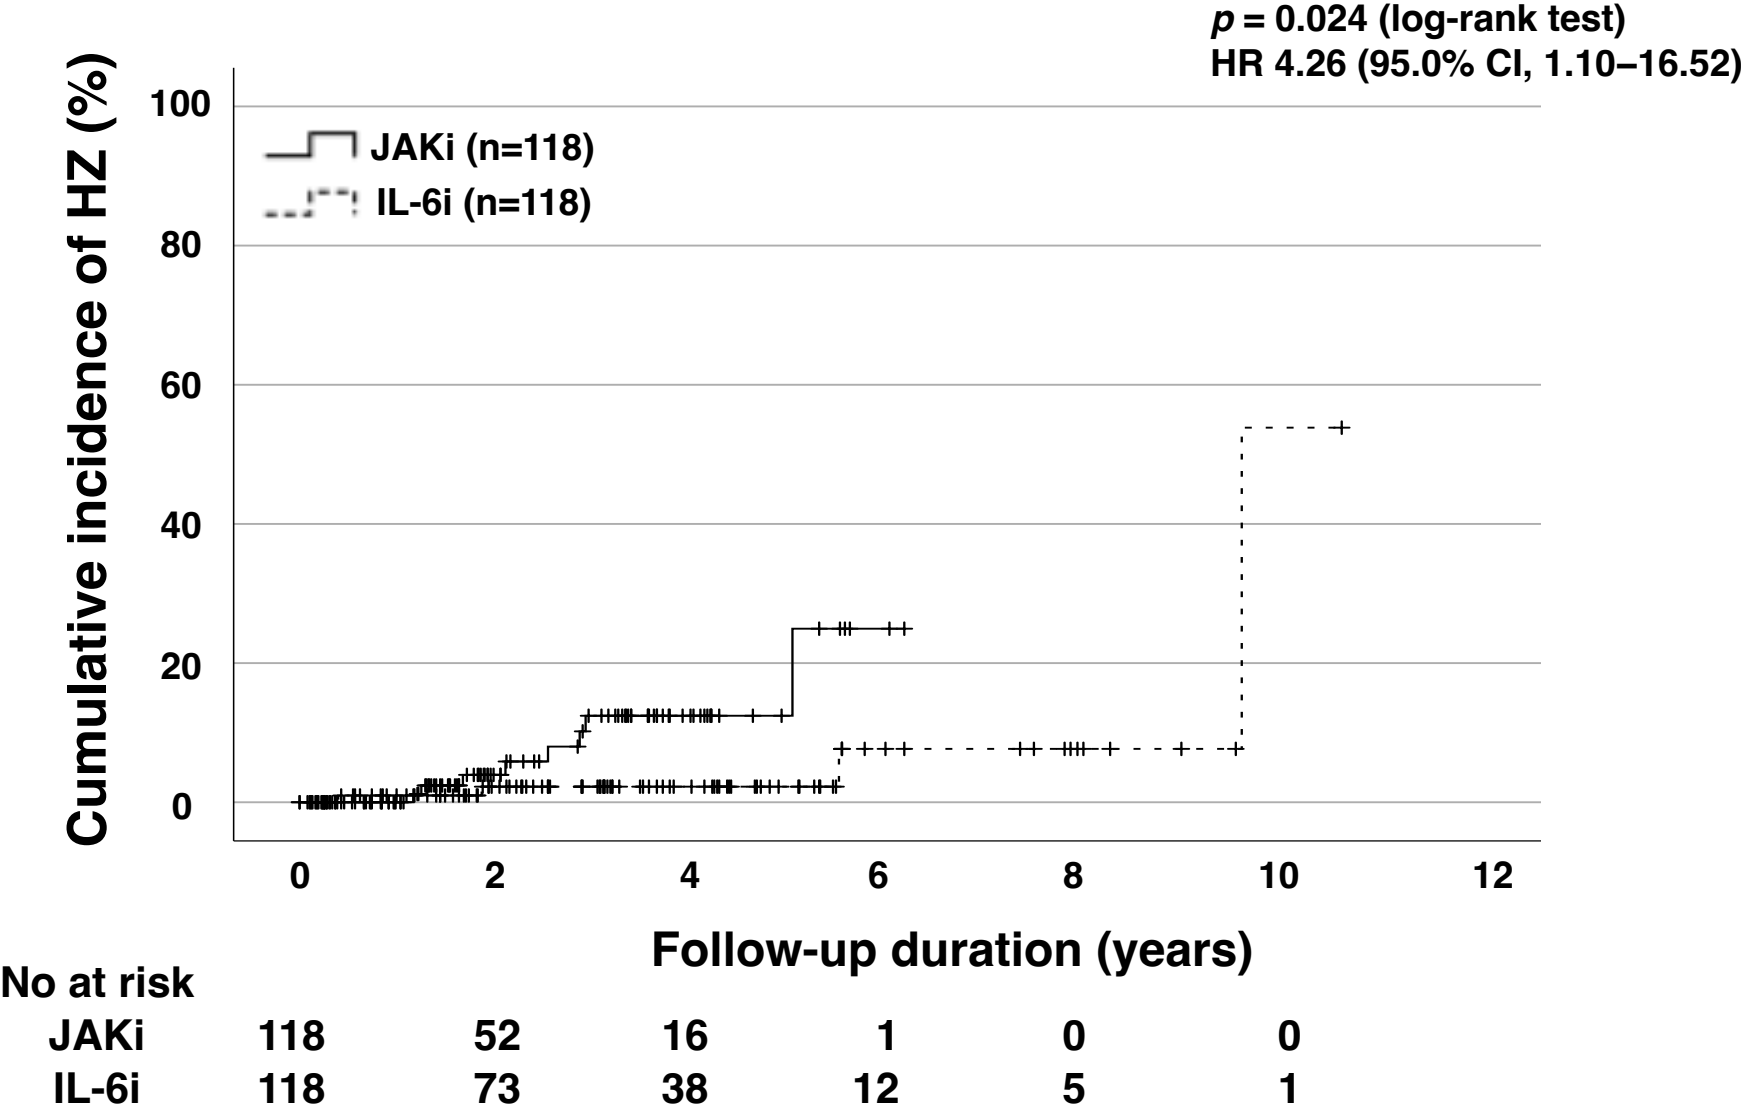

Supplement: s1 [file s1]

Supplementary Fig. 1

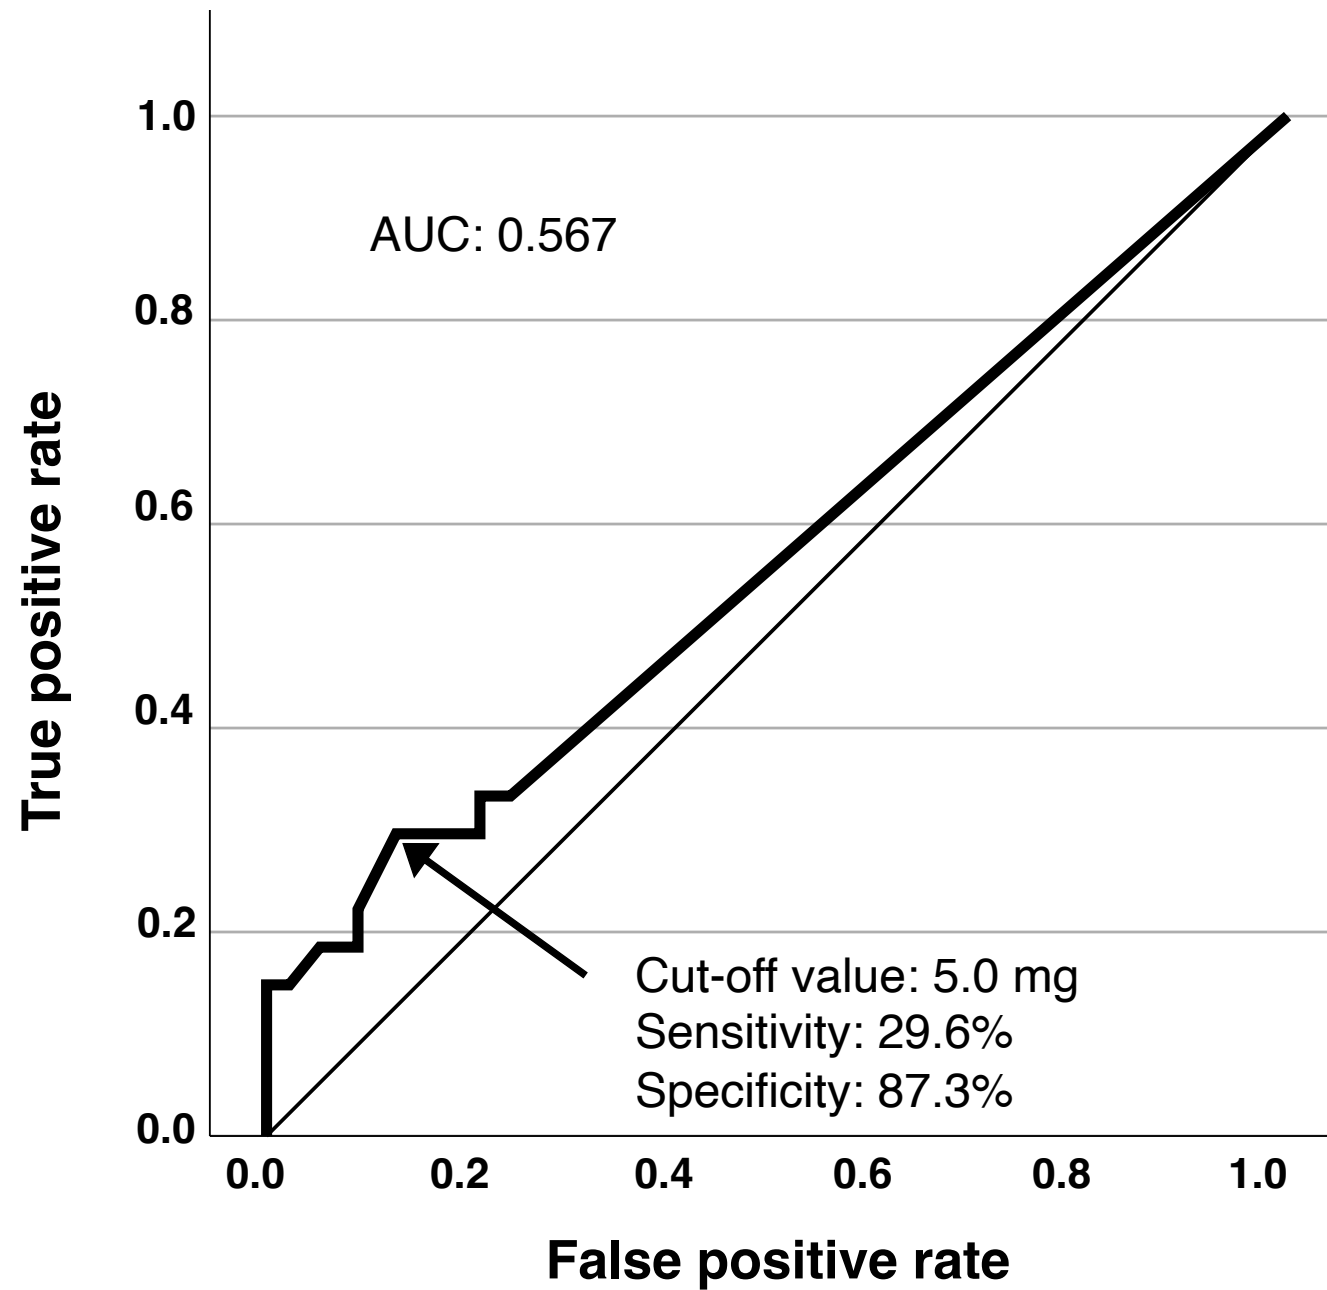

Supplement: s1 [file s1]
